# Supplementary material
Source: publisher figshare collection journal article supplement (https://acs.figshare.com/ndownloader/files/4228471)
Supplement: Supplementary file 1 [file 4228471]

# Effects of Extending the Computational Model on DNA–Protein T-shaped Interactions: The Case of Adenine–Histidine Dimers

Lesley R. Rutledge, Lex Navarro-Whyte, Terri L. Peterson, and Stacey D. Wetmore\*

Department of Chemistry and Biochemistry, 4401 University Drive, Lethbridge, Alta. Canada T1K 3M4.

## **Supporting Information**

**Table SI-1.** Strongest MP2/6-31G\*(0.25) Interaction Energies ( $\Delta E$ , kJ mol<sup>-1</sup>) of (Neutral) Histidine (edge)–Adenine (face) Dimers as Determined by Varying  $R_1$  (Å),  $\alpha$  (°), and  $R_2$  ((X-displacement, Y-displacement), Å)<sup>a</sup>

| Model                                  | $\theta$ | $R_1$ | $\Delta E$ | $\alpha$ | $\Delta E$ | $R_2$     | $\Delta E$ |
|----------------------------------------|----------|-------|------------|----------|------------|-----------|------------|
| Protein Backbone <sup>b</sup>          |          |       |            |          |            |           |            |
| HIS <sub><math>\delta</math></sub> '   | 2        | 4.7   | -11.8      | 300      | -14.5      | —         |            |
|                                        | 3        | 4.3   | -7.7       | 240      | -10.7      | —         |            |
|                                        | B        | 4.4   | -21.4      | 240      | -26.6      | (0, -0.5) | -27.6      |
|                                        | C        | 4.3   | -12.8      | 300      | -17.1      | —         |            |
|                                        | D        | 4.4   | -12.8      | 120      | -14.7      | —         |            |
| HIS <sub><math>\epsilon</math></sub> ' | 1        | 4.5   | -18.7      | 60       | -21.0      | —         |            |
|                                        | 2        | 4.7   | -13.5      | 330      | -14.5      | —         |            |
|                                        | A        | 4.5   | -17.9      | 60       | -25.3      | (0, -0.5) | -26.2      |
|                                        | B        | 4.4   | -19.8      | 240      | -23.9      | (0, -0.5) | -24.5      |
|                                        | C        | 4.3   | -20.1      | 300      | -25.2      | (1, 1)    | -27.6      |

<sup>a</sup> See Figure 1 for structures of histidine and adenine, Figure 4 for definitions of  $R_1$ ,  $\alpha$ , and  $R_2$ , and Figure 5 for definitions of edges ( $\theta$ ) considered in the present study. <sup>b</sup> Dimers between truncated adenine (A) and extended histidine (see Computational Details for definition of HIS <sub>$\delta$</sub> ' and HIS <sub>$\epsilon$</sub> ').

**Table SI-2.** Strongest MP2/6-31G\*(0.25) Interaction Energies ( $\Delta E$ , kJ mol<sup>-1</sup>) of (Cationic) Protonated Histidine (edge)–Adenine (face) Dimers as Determined by Varying  $R_1$  (Å),  $\alpha$  (°), and  $R_2$  ((X-displacement, Y-displacement), Å)<sup>a</sup>

| Model                                       | $\theta$ | $R_1$ | $\Delta E$ | $\alpha$ | $\Delta E$ | $R_2$     | $\Delta E$ |
|---------------------------------------------|----------|-------|------------|----------|------------|-----------|------------|
| Protein Backbone <sup>b</sup>               |          |       |            |          |            |           |            |
| HIS <sub>δ<sub>E</sub></sub> <sup>+''</sup> | 1        | 4.3   | −44.0      | 240      | −47.7      | (2, 1.5)  | −57.8      |
|                                             | 2        | 4.5   | −32.2      | 240      | −37.6      | —         |            |
|                                             | A        | 4.2   | −44.8      | 300      | −51.9      | (2,0)     | −53.4      |
|                                             | B        | 4.2   | −43.9      | 240      | −54.9      | (0, −0.5) | −55.6      |
|                                             | B'       | 4.2   | −43.3      | 240      | −55.0      | (0, 0)    | −55.0      |

<sup>a</sup> See Figure 1 for structures of protonated histidine and adenine, Figure 4 for definitions of  $R_1$ ,  $\alpha$ , and  $R_2$ , and Figure 5 for definitions of edges ( $\theta$ ) considered in the present study. <sup>b</sup> Dimers between truncated adenine (A) and extended (protonated) histidine (see Computational Details for definition of HIS<sub>δ<sub>E</sub></sub><sup>+''</sup>).

**Table SI-3.** Strongest MP2/6-31G\*(0.25) Interaction Energies ( $\Delta E$ , kJ mol<sup>-1</sup>) of (Neutral) Adenine (edge)–Histidine (face) Dimers as Determined by Varying  $R_1$  (Å),  $\alpha$  (°), and  $R_2$  ((X-displacement, Y-displacement), Å)<sup>a</sup>

| Model                                 | $\theta$ | $R_1$ | $\Delta E$ | $\alpha$ | $\Delta E$ | $R_2$      | $\Delta E$ |
|---------------------------------------|----------|-------|------------|----------|------------|------------|------------|
| Protein Backbone <sup>b</sup>         |          |       |            |          |            |            |            |
| HIS <sub><math>\delta'</math></sub>   | 1        | 3.2   | -11.1      | 330      | -14.0      | —          |            |
|                                       | 2        | 2.5   | -8.7       | 90       | -9.5       | —          |            |
|                                       | 3        | 3.2   | -6.8       | 150      | -13.5      | —          |            |
|                                       | 4        | 2.3   | -16.1      | 120      | -29.8      | (0.5, 1)   | -34.0      |
|                                       | 5        | 2.5   | -9.5       | 150      | -17.5      | —          |            |
|                                       | 6        | 3.2   | -9.5       | 150      | -10.6      | —          |            |
|                                       | 7        | 3.5   | -13.3      | 330      | -15.9      | —          |            |
|                                       | 8        | 2.4   | -20.7      | 300      | -25.2      | (0, 0)     | -25.2      |
|                                       | A        | 3.8   | -5.9       | 150      | -9.7       | —          |            |
|                                       | B        | 3.6   | -9.1       | 330      | -10.4      | —          |            |
|                                       | C        | 3.4   | -1.9       | 150      | -18.6      | —          |            |
|                                       | D        | 2.6   | -17.0      | 150      | -21.8      | (0.5, 0.5) | -24.3      |
|                                       | E        | 3.7   | -5.4       | 150      | -15.7      | —          |            |
|                                       | F        | 3.4   | -10.0      | 330      | -11.7      | —          |            |
|                                       | G        | 2.7   | -14.5      | 330      | -14.8      | (0.5, 0.5) | -17.0      |
|                                       | H        | 3.5   | -9.7       | 330      | -12.8      | —          |            |
| HIS <sub><math>\epsilon'</math></sub> | 1        | 3.2   | -10.5      | 330      | -13.5      | —          |            |
|                                       | 2        | 2.5   | -9.0       | 90       | -11.1      | —          |            |
|                                       | 3        | 3.2   | -5.6       | 150      | -13.0      | —          |            |
|                                       | 4        | 2.3   | -17.2      | 120      | -28.3      | (0.5, 1)   | -32.3      |
|                                       | 5        | 2.4   | -9.7       | 120      | -16.4      | —          |            |
|                                       | 6        | 3.2   | -8.6       | 150      | -10.0      | —          |            |
|                                       | 7        | 3.2   | -8.7       | 300      | -13.7      | —          |            |
|                                       | 8        | 2.4   | -17.5      | 300      | -22.5      | (0.5, 1)   | -22.8      |
|                                       | A        | 3.8   | -6.5       | 150      | -8.8       | —          |            |
|                                       | B        | 3.7   | -8.2       | 330      | -9.0       | —          |            |
|                                       | C        | 3.3   | -3.7       | 120      | -16.3      | —          |            |
|                                       | D        | 2.6   | -17.4      | 150      | -20.7      | (0.5, 0.5) | -23.3      |
|                                       | E        | 3.7   | -5.9       | 120      | -13.6.     | —          |            |
|                                       | F        | 3.3   | -7.3       | 330      | -8.4       | —          |            |
|                                       | G        | 2.7   | -14.7      | 330      | -14.9      | (0.5, 0.5) | -16.9      |
|                                       | H        | 3.3   | -9.2       | 330      | -11.7      | —          |            |
| Deoxyribose <sup>c</sup>              |          |       |            |          |            |            |            |
| HIS'                                  | 1        | 3.2   | -8.4       | 330      | -8.9       | —          |            |
|                                       | 2        | 2.6   | -5.9       | 210      | -7.5       | —          |            |
|                                       | 6        | 3.3   | -2.4       | 150      | -10.5      | —          |            |
|                                       | 7        | 3.3   | -6.0       | 270      | -13.0      | —          |            |
|                                       | 8        | 2.4   | -19.0      | 330      | -21.2      | (0, 0)     | -21.2      |
|                                       | A        | 3.8   | -3.5       | 150      | -6.6       | —          |            |
|                                       | F        | 3.4   | -2.6       | 300      | -5.4       | —          |            |
|                                       | G        | 2.8   | -8.9       | 180      | -15.0      | (0, 0.5)   | -15.9      |
|                                       | H        | 3.4   | -7.0       | 330      | -8.7       | —          |            |

<sup>a</sup> See Figure 1 for structures of histidine and adenine, Figure 4 for definitions of  $R_1$ ,  $\alpha$ , and  $R_2$ , and Figure 5 for definitions of edges ( $\theta$ ) considered in the present study. <sup>b</sup> Dimers between truncated adenine (A) and extended histidine (see Computational Details for definition of HIS <sub>$\delta'$</sub>  and HIS <sub>$\epsilon'$</sub> ). <sup>c</sup> Dimers between truncated histidine (HIS) and extended adenine (A<sub>dR</sub>).

**Table SI-4.** Strongest MP2/6-31G\*(0.25) Interaction Energies ( $\Delta E$ , kJ mol<sup>-1</sup>) of (Cationic) Adenine (edge)–Protonated Histidine (face) Dimers as Determined by Varying  $R_1$  (Å),  $\alpha$  (°), and  $R_2$  ((X-displacement, Y-displacement), Å)<sup>a</sup>

| Model                          | $\theta$ | $R_1$ | $\Delta E$ | $\alpha$ | $\Delta E$ | $R_2$       | $\Delta E$ |
|--------------------------------|----------|-------|------------|----------|------------|-------------|------------|
| Protein Backbone <sup>b</sup>  |          |       |            |          |            |             |            |
| HIS <sub>δε</sub> <sup>+</sup> | 1        | 3.1   | -33.5      | 240      | -40.3      | (-0.5, 0)   | -41.1      |
|                                | 2        | 2.4   | -29.9      | 150      | -30.4      | —           |            |
|                                | 3        | 3.0   | -34.5      | 60       | -39.4      | (0, 0)      | -39.4      |
|                                | 4        | 2.4   | -1.2       | 60       | -2.6       | —           |            |
|                                | 5        | 2.6   | 3.3        | 60       | 1.6        | —           |            |
|                                | 6        | 3.1   | -20.4      | 60       | -24.4      | —           |            |
|                                | 7        | 3.6   | -14.9      | 240      | -17.8      | —           |            |
|                                | 8        | 2.5   | -18.7      | 240      | -22.6      | —           |            |
|                                | A        | 3.5   | -32.7      | 30       | -32.8      | (-0.5, 1)   | -34.7      |
|                                | B        | 3.5   | -30.9      | 180      | -32.2      | (0, 1)      | -34.4      |
|                                | C        | 3.0   | -30.0      | 60       | -35.2      | (1, -0.5)   | -39.9      |
|                                | D        | 2.9   | 11.0       | 30       | 9.9        | —           |            |
|                                | E        | 3.5   | -14.2      | 60       | -16.7      | —           |            |
|                                | F        | 3.4   | -14.8      | 240      | -20.4      | —           |            |
|                                | G        | 2.9   | -2.4       | 240      | -3.4       | —           |            |
|                                | H        | 3.4   | -26.0      | 240      | -34.6      | (0.5, -0.5) | -36.4      |

<sup>a</sup> See Figure 1 for structures of protonated histidine and adenine, Figure 4 for definitions of  $R_1$ ,  $\alpha$ , and  $R_2$ , and Figure 5 for definitions of edges ( $\theta$ ) considered in the present study. <sup>b</sup> Dimers between truncated adenine (A) and extended (protonated) histidine (see Computational Details for definition of HIS<sub>δε</sub><sup>+</sup>).
